# Supplementary material for: The N Terminus of Monoamine Transporters Is a Lever Required for the Action of Amphetamines
Source: PubMed Central journal article supplement — J Biol Chem. 2010 Jan 29;285(14):10924–38. doi: 10.1074/jbc.M109.083154 (PMC2856298; doi:10.1074/jbc.m109.083154), 2010-01-29

## Supplementary Figures:

### Supplementary Figure A: Expression level of wild type SERT and mutants in *Xenopus laevis* oocytes using the Rhodamine-labeled benzotropine JHC1-64.

*Xenopus laevis* oocytes expressing wild type SERT, SERT<sup>T81A</sup> and <sup>Δ64</sup>SERT were studied using confocal microscopy as described under 'Experimental Procedures'. Concentration of the Rhodamine-labeled benzotropine JHC1-64 is indicated in each picture. All oocytes were checked for expression by measuring PCA-induced currents prior to the experiment under two-electrode voltage clamp conditions (*data not shown*).

### Supplementary Figure B: Course of the root mean square deviations (RMSD) of the protein backbones during MD simulations. RMSD of the wild type SERT (displayed in blue) and after mutation of to SERT<sup>T81A</sup> (displayed in red) or SERT<sup>T81D</sup> (displayed in green).

### Supplementary Figure C: Amphetamine-induced [<sup>3</sup>H]5HT release by the <sup>Δ64</sup>SERT truncation mutant expressed in *Xenopus laevis* oocytes.

PCA-induced release of [<sup>3</sup>H]5HT in cRNA-injected *X. laevis* oocytes under current clamp conditions (n=2, from two individual experiments). The dashed line is a representative wild type SERT trace, adapted from Fig. 5. The inset graph illustrates the membrane potential recorded during release experiments under current clamp conditions, as described under 'Experimental Procedures'.

# Supplementary Figure A

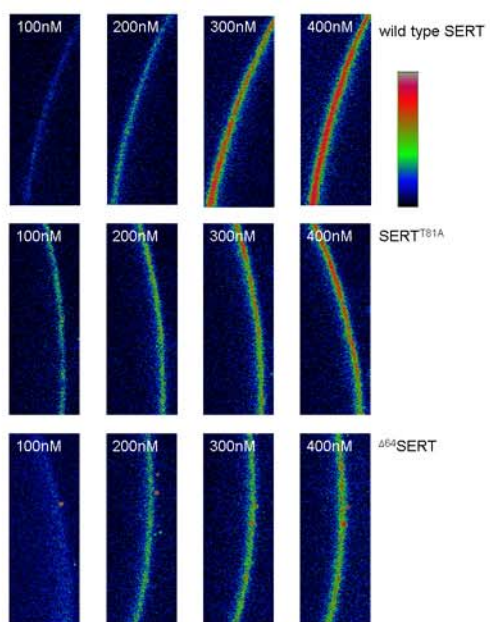

Supplementary Fig. B

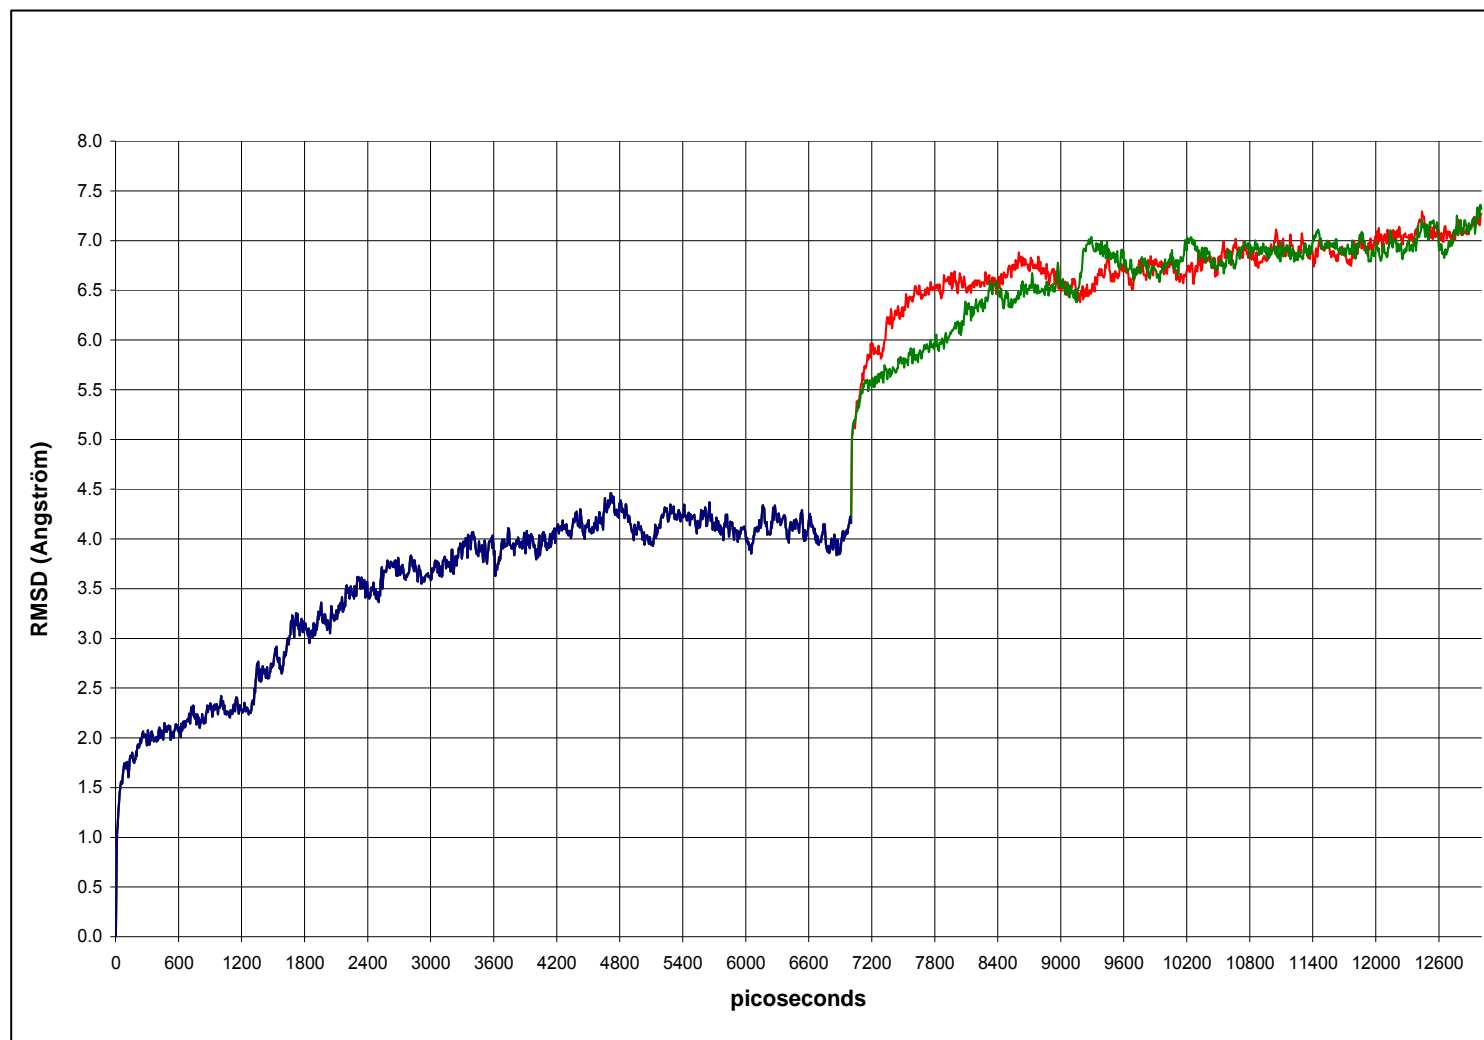

# Supplementary Fig. C

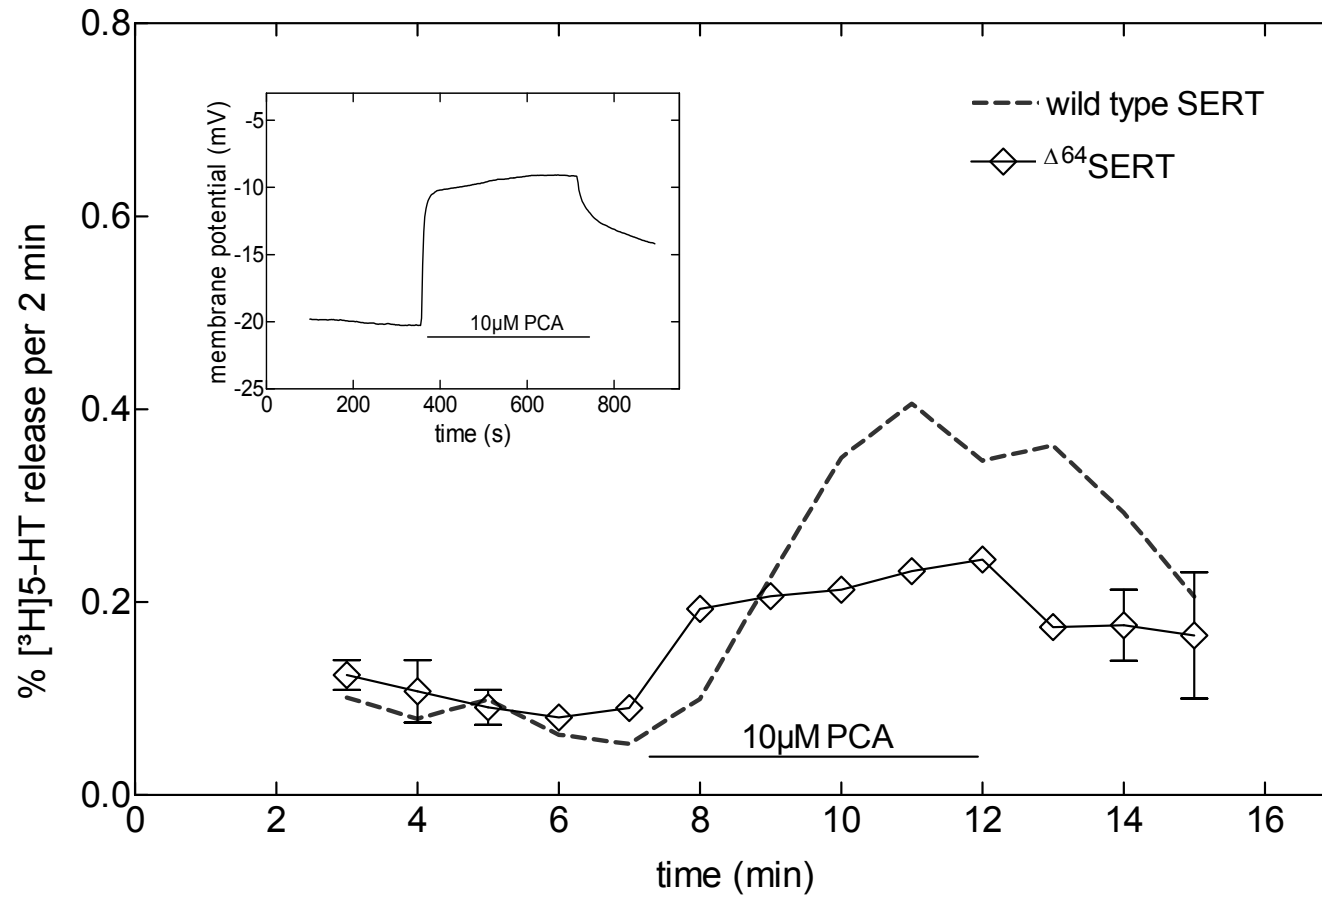

Supplement: supp_M109.083154_jbc.M109.083154-1.pdf [file supp_M109.083154_jbc.M109.083154-1.pdf]
